# Supplementary material for: A Bayesian method for selecting data points for thermodynamic modeling of off-stoichiometric metal oxides
Source: Royal Society of Chemistry journal article supplement (doi:10.1039/d3ta06627d), 2024-01-01
Supplement: d3ta06627d1.pdf [file d3ta06627d1.pdf]

# A Bayesian Method for Selecting Data Points for Thermodynamic Modeling of Off-Stoichiometric Metal Oxides

Steven A. Wilson<sup>1</sup>, Christopher L. Muhich<sup>1,2\*</sup>

<sup>1</sup> Chemical Engineering, School for the Engineering of Matter, Transport, & Energy, Arizona State University, 551 E. Tyler Mall, Tempe Arizona, 85287, USA

<sup>2</sup> Materials Science & Engineering, School for the Engineering of Matter, Transport, & Energy, Arizona State University, 551 E. Tyler Mall, Tempe Arizona, 85287, USA

\* Corresponding Author

**Table SI-1:** 1<sup>st</sup> order Redlich-Kister expansion of excess terms for a three sublattice CEF model with two conditions on each sublattice.

|            |                                                                                                                                                                                        |
|------------|----------------------------------------------------------------------------------------------------------------------------------------------------------------------------------------|
| L1<br>L2   | $\gamma_{Sr}^A \gamma_{Ba}^A \gamma_{Fe}^B \gamma_{Fe}^{+3} \gamma_O^O (L_1^\circ + (\gamma_{Sr}^A - \gamma_{Ba}^A) L_2')$                                                             |
| L3<br>L4   | $\gamma_{Sr}^A \gamma_{Ba}^A \gamma_{Fe}^B \gamma_{Fe}^{+3} \gamma_{Va}^O (L_3^\circ + (\gamma_{Sr}^A - \gamma_{Ba}^A) L_4')$                                                          |
| L5<br>L6   | $\gamma_{Sr}^A \gamma_{Ba}^A \gamma_{Fe}^B \gamma_{Fe}^{+4} \gamma_O^O (L_5^\circ + (\gamma_{Sr}^A - \gamma_{Ba}^A) L_6')$                                                             |
| L7<br>L8   | $\gamma_{Sr}^A \gamma_{Ba}^A \gamma_{Fe}^B \gamma_{Fe}^{+4} \gamma_{Va}^O (L_7^\circ + (\gamma_{Sr}^A - \gamma_{Ba}^A) L_8')$                                                          |
| L9<br>L10  | $\gamma_{Fe}^B \gamma_{Fe}^{+3} \gamma_{Fe}^B \gamma_{Fe}^{+4} \gamma_{Sr}^A \gamma_O^O (L_9^\circ + (\gamma_{Fe}^B \gamma_{Fe}^{+3} - \gamma_{Fe}^B \gamma_{Fe}^{+4}) L_{10}')$       |
| L11<br>L12 | $\gamma_{Fe}^B \gamma_{Fe}^{+3} \gamma_{Fe}^B \gamma_{Fe}^{+4} \gamma_{Ba}^A \gamma_O^O (L_{11}^\circ + (\gamma_{Fe}^B \gamma_{Fe}^{+3} - \gamma_{Fe}^B \gamma_{Fe}^{+4}) L_{12}')$    |
| L13<br>L14 | $\gamma_{Fe}^B \gamma_{Fe}^{+3} \gamma_{Fe}^B \gamma_{Fe}^{+4} \gamma_{Sr}^A \gamma_{Va}^O (L_{13}^\circ + (\gamma_{Fe}^B \gamma_{Fe}^{+3} - \gamma_{Fe}^B \gamma_{Fe}^{+4}) L_{14}')$ |
| L15<br>L16 | $\gamma_{Fe}^B \gamma_{Fe}^{+3} \gamma_{Fe}^B \gamma_{Fe}^{+4} \gamma_{Ba}^A \gamma_{Va}^O (L_{15}^\circ + (\gamma_{Fe}^B \gamma_{Fe}^{+3} - \gamma_{Fe}^B \gamma_{Fe}^{+4}) L_{16}')$ |
| L17<br>L18 | $\gamma_O^O \gamma_{Va}^O \gamma_{Sr}^A \gamma_{Fe}^B \gamma_{Fe}^{+3} (L_{17}^\circ + (\gamma_O^O - \gamma_{Va}^O) L_{18}')$                                                          |
| L19<br>L20 | $\gamma_O^O \gamma_{Va}^O \gamma_{Ba}^A \gamma_{Fe}^B \gamma_{Fe}^{+3} (L_{19}^\circ + (\gamma_O^O - \gamma_{Va}^O) L_{20}')$                                                          |
| L21<br>L22 | $\gamma_O^O \gamma_{Va}^O \gamma_{Sr}^A \gamma_{Fe}^B \gamma_{Fe}^{+4} (L_{21}^\circ + (\gamma_O^O - \gamma_{Va}^O) L_{22}')$                                                          |
| L23<br>L24 | $\gamma_O^O \gamma_{Va}^O \gamma_{Ba}^A \gamma_{Fe}^B \gamma_{Fe}^{+4} (L_{23}^\circ + (\gamma_O^O - \gamma_{Va}^O) L_{24}')$                                                          |

**Table SI-2:** Table of optimized CEF parameters from Cross fit algorithm for Bayesian iterations 31 – 38 and the ground truth (all data) model

|                | litr 31    | litr 32    | litr 33    | litr 34    | litr 35    | litr 36    | litr 37    | litr 38    | Ground Truth |
|----------------|------------|------------|------------|------------|------------|------------|------------|------------|--------------|
| <b>A17</b>     | 1.004E-04  | 1.004E-04  | 1.000E-04  | 1.004E-04  | 1.004E-04  | 1.004E-04  | 1.000E-04  | 1.004E-04  | 1.000E-04    |
| <b>A18</b>     | 1.002E-04  | 1.002E-04  | 1.000E-04  | 1.002E-04  | 1.003E-04  | 1.003E-04  | 1.000E-04  | 1.003E-04  | 1.000E-04    |
| <b>B17</b>     | 1.250E-04  | 1.264E-04  | 8.504E-05  | 1.246E-04  | 1.292E-04  | 1.297E-04  | 8.351E-05  | 1.333E-04  | 8.047E-05    |
| <b>B18</b>     | 1.132E-04  | 1.134E-04  | 8.971E-05  | 1.124E-04  | 1.155E-04  | 1.158E-04  | 8.866E-05  | 1.177E-04  | 8.658E-05    |
| <b>C17</b>     | -9.624E-05 | -1.395E-04 | -7.038E-05 | -1.173E-04 | -1.395E-04 | -1.523E-04 | -8.207E-05 | -1.375E-04 | -8.637E-05   |
| <b>C18</b>     | -6.937E-05 | -1.014E-04 | -2.526E-05 | -8.477E-05 | -9.770E-05 | -1.067E-04 | -3.428E-05 | -1.009E-04 | -3.607E-05   |
| <b>gDiffA1</b> | 9.348E-05  | 9.343E-05  | 9.337E-05  | 9.337E-05  | 9.341E-05  | 9.341E-05  | 9.339E-05  | 9.330E-05  | 9.282E-05    |
| <b>gDiffA2</b> | 9.930E-05  | 9.929E-05  | 9.930E-05  | 9.934E-05  | 9.934E-05  | 9.934E-05  | 9.935E-05  | 9.934E-05  | 9.918E-05    |
| <b>gDiffB1</b> | -7.135E-04 | -7.189E-04 | -7.246E-04 | -7.214E-04 | -7.173E-04 | -7.166E-04 | -7.192E-04 | -7.279E-04 | -7.980E-04   |
| <b>gDiffB2</b> | -1.205E-05 | -1.221E-05 | -1.004E-05 | -5.107E-06 | -4.628E-06 | -4.656E-06 | -3.957E-06 | -4.637E-06 | -1.934E-05   |
| <b>gDiffC1</b> | 1.309E-04  | 1.316E-04  | 1.324E-04  | 1.320E-04  | 1.315E-04  | 1.314E-04  | 1.317E-04  | 1.329E-04  | 1.433E-04    |
| <b>gDiffC2</b> | 3.551E-05  | 3.560E-05  | 3.544E-05  | 3.462E-05  | 3.432E-05  | 3.415E-05  | 3.433E-05  | 3.449E-05  | 3.602E-05    |

Excess Terms

Endmember Terms
